# Supplementary material
Source: publisher figshare collection journal article supplement (https://tandf.figshare.com/articles/dataset/_/7636652)
Supplement: Supplementary file 1 [file 3]

Archive with 9 entries (9 files):
- S1.docx
- S3.docx
- S4_rev.docx
- S5_rev.docx
- S6.docx
- S7_rev.docx
- captions_Supplementary_figures.docx
- captions_Supplementary_figures.pdf
- figureS2.docx
